# Supplementary material for: Interfacial friction-induced electronic excitation mechanism for tribo-tunneling current generation
Source: Royal Society of Chemistry journal article supplement (doi:10.1039/c8mh01259h), 2019-01-01
Supplement: c8mh01259h1.pdf [file c8mh01259h1.pdf]

## Supporting Information

### Interfacial friction-induced electronic excitation mechanism for tribo-tunneling current generation

*Jun Liu\**, *Keren Jiang*, *Lan Nguyen*, *Zhi Li*, and *Thomas Thundat\**

#### 1. Schematic of Surface Potential

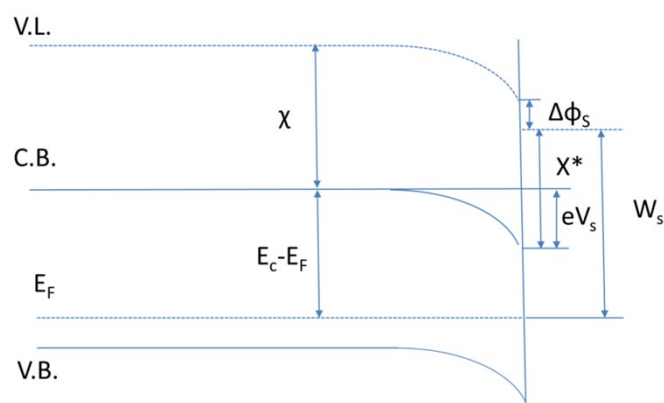

**Figure S1** Schematic diagram of the electronic band structure at a semiconductor surface. Physical meanings of the symbols can be found in the main text

#### 2. AFM cantilever calibration

All the AFM experiments were conducted with Dimension Icon (Bruker, CA). The B-doped diamond probes are purchased from AppNano, USA. The deflection sensitivity of the cantilever is determined to be 99 nm/V by force curve measurement (**Figure S4**). The spring constant  $k$  and resonance frequency  $f_0$  of the cantilever is estimated to be  $\sim 5.4$  N/m and  $\sim 97$  kHz, respectively, by thermal tune method (**Figure S5**).

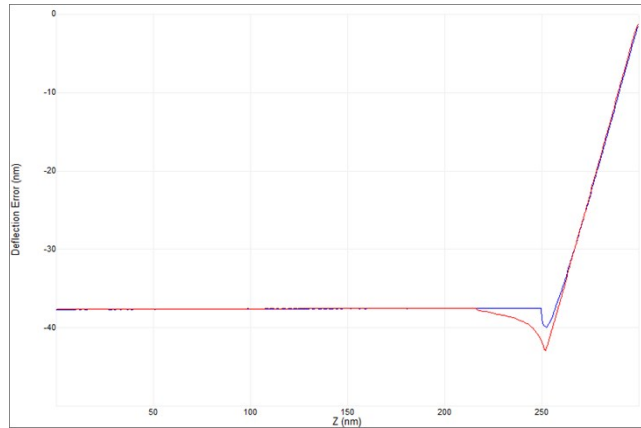

**Figure S2.** Force curve measurement

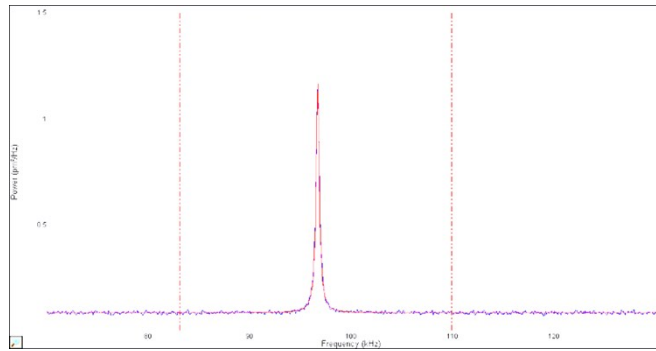

**Figure S3.** Thermal tune of the cantilever

### 3. Peakforce-CAFM measurement

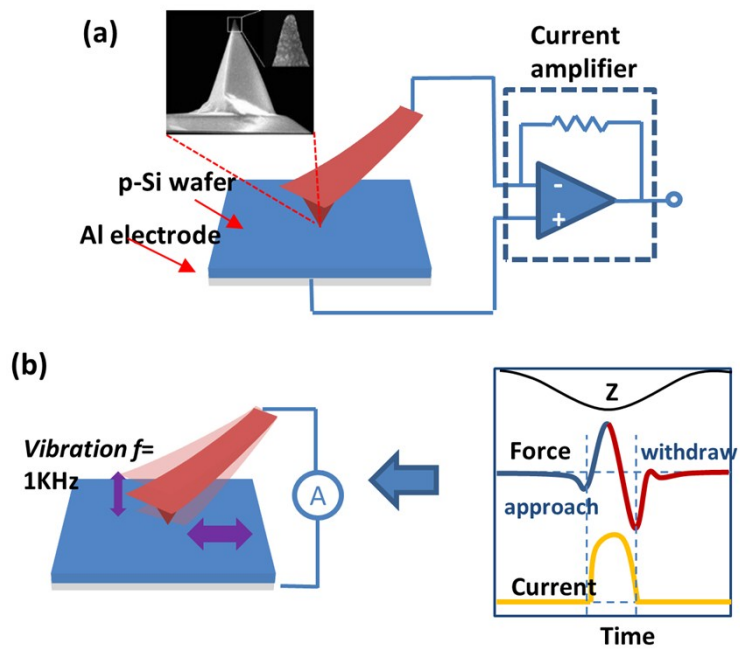

---

**Figure S4.** (a) Schematic of conductive-AFM (C-AFM) measurement. A boron-doped diamond tip is used to slide on the p-type silicon sample. (b) is the schematic of peakforce tapping mode: the AFM probe is scanned across the sample at a frequency of 1 kHz, and the feedback loop controls the maximum force on the tip (Peak force) as the setpoint for each individual cycle (top). The corresponding time-dependent tip position, force, and current in a Peakforce tapping based C-AFM mode (right).

#### 4. Tip-sample Contact Area Estimation

In the macroscale measurement, the tip-sample contact area  $A$  is estimated according to the optical microscope image. In the AFM measurement, according to DMT model:

$$A = \pi \left[ \frac{R}{K} (L + 2\pi R\gamma) \right]^{2/3}, \quad (\text{S1})$$

where  $R$  is AFM tip radius,  $L$  is the load (contact force  $F$ ), and  $\gamma$  is the work of adhesion. The term  $2\pi R\gamma$  can be considered as an ‘additional load’  $L_{\text{ad}}$ , which is determined by the ‘pull-off’ force in the force curve.  $K$  is the reduced Young’s modulus:

$$K = \frac{3}{4} \left( \frac{1 - \nu_s^2}{E_s} + \frac{1 - \nu_t^2}{E_t} \right), \quad (\text{S2})$$

where  $E_t$  and  $E_s$  are Young’s moduli and  $\nu_t$  and  $\nu_s$  are the Poisson ratios of the tip and the sample, respectively.

#### 5. $J$ and power density as a function of load resistance $R$

The data were collected by a Keithley 2450 SourceMeter SMU (Tektronix, USA). Unlike the high impedance in polymer-based TENGs (high resistance and capacitance), the equivalent circuit components in our case is relatively simpler, which can be approximated as a DC voltage source, an internal resistance and an external resistance connected in series. Therefore, the  $J$  and the *power density* can be modeled as:

$$J = J_0 r / (R + r), \quad (\text{S3})$$

$$\text{Power density} = J_0^2 r^2 R A / (R + r)^2, \quad (\text{S4})$$

The fitting results are shown in Fig. 2d in the main text.

## 6. Force-dependent $A$ and $J$

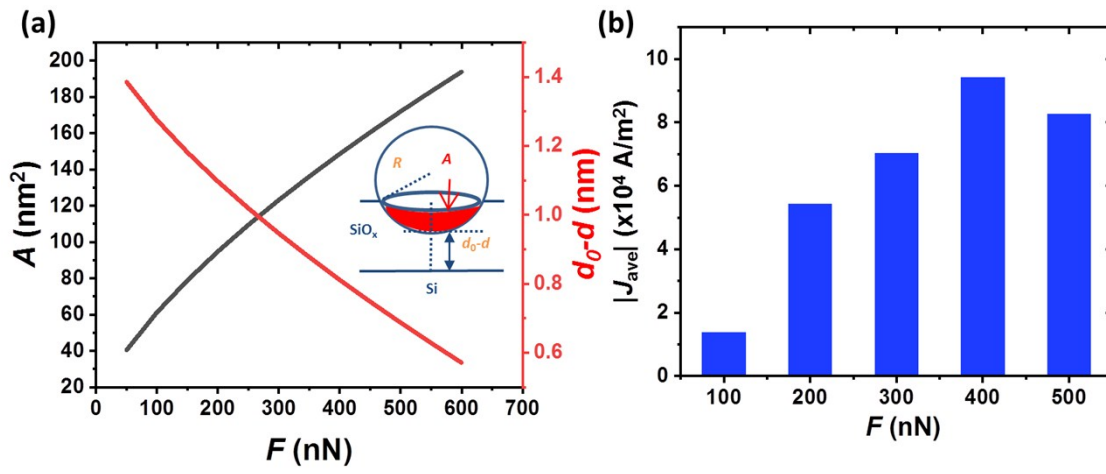

**Figure S5.** (a) Tip-sample contact area  $A$  and the effective oxide thickness ( $d_0-d$ ) as a function of contact force  $F$ . (b) Average C-AFM current density  $J_{\text{ave}}$  as a function of contact force.
